# Supplementary material
Source: PubMed Central journal article supplement (PMC4329831)
Supplement: jf5055326_si_001.pdf [file jf5055326_si_001.pdf]

## **Colorless Chlorophyll Catabolites in Senescent Florets of Broccoli**

*(Brassica oleracea* var. *Italica*)

### **Supporting Information**

**Matthias H. Roiser, Thomas Müller and Bernhard Kräutler\***

Institute of Organic Chemistry and Center for Molecular Biosciences,

University of Innsbruck,

Center of Chemistry and Biomedicine, Innrain 80/82, A-6020 Innsbruck, Austria

\*phone: 43-512-507-57700, fax: +43-512-507-57799;

E-Mail: [bernhard.kraeutler@uibk.ac.at](mailto:bernhard.kraeutler@uibk.ac.at)

*Dedicated to the memory of Paula Enders*

## Materials and Methods

### 1 Chemicals and Plant Materials

*Chemicals:* HPLC grade HiPerSolv CHROMANORM methanol (MeOH) was from VWR PROLABO. Potassium dihydrogen phosphate and potassium phosphate dibasic anhydrous were from Sigma-Aldrich.

*Plant Material:* Fresh, green broccoli (*Brassica oleracea* var. *Italica*), produced by Conzorzio APO-FOGGIA s.c., Italy, was typically harvested five days before it was sold at the store (Spar Supermarket) in Innsbruck.

### 2 Spectroscopy

UV/Vis: Hitachi U3000 spectrophotometer,  $\lambda_{\max}$  [nm] (relative  $\epsilon$ ), in H<sub>2</sub>O. CD: Jasco J715 spectropolarimeter,  $\lambda_{\max}$  and  $\lambda_{\min}$  [nm] ( $\Theta$ ), in H<sub>2</sub>O. <sup>1</sup>H nuclear magnetic resonance (NMR): Bruker UltraShield 600 MHz or Varian Unity Inova 500 MHz spectrometers,  $\delta$ [ppm] with  $\delta(\text{HDO}) = 4.79$  ppm, in D<sub>2</sub>O). Electrospray ionization mass spectrometry (ESI-MS): Finnigan MAT 95S, m/z (rel. intensity), positive-ion mode, 1.4 kV spray voltage; signals with > 5% rel. intensity are listed.

### 3 High Performance Liquid Chromatography (HPLC)

Dionex P680 HPLC Pump, on-line UV/Vis-spectra: Dionex UVD340U; column: Phenomenex HyperClone 5 $\mu$  ODS 250mm x 4.6 mm i.d., column at 20 °C, protected with a Phenomenex ODS 4 mm x 3.0 mm i.d. pre-column was used with a flow rate 0.5 ml.min<sup>-1</sup>. Solvent A: 50 mM aqueous potassium phosphate buffer (pH 7), solvent B: MeOH, HPLC grade; solvent composition 1: 0-5 min: A/B = 80/20; 5-55 min: A/B = 80/20 to 30/70, constant gradient; 55-60 min: 30/70 to 0/100, constant gradient; 60-70 min: A/B = 0/100; 70-75 min: A/B = 0/100 to 80/20, constant gradient. Analytical HPLC: sample size 50  $\mu$ l, semi-preparative HPLC: sample size 2 ml.

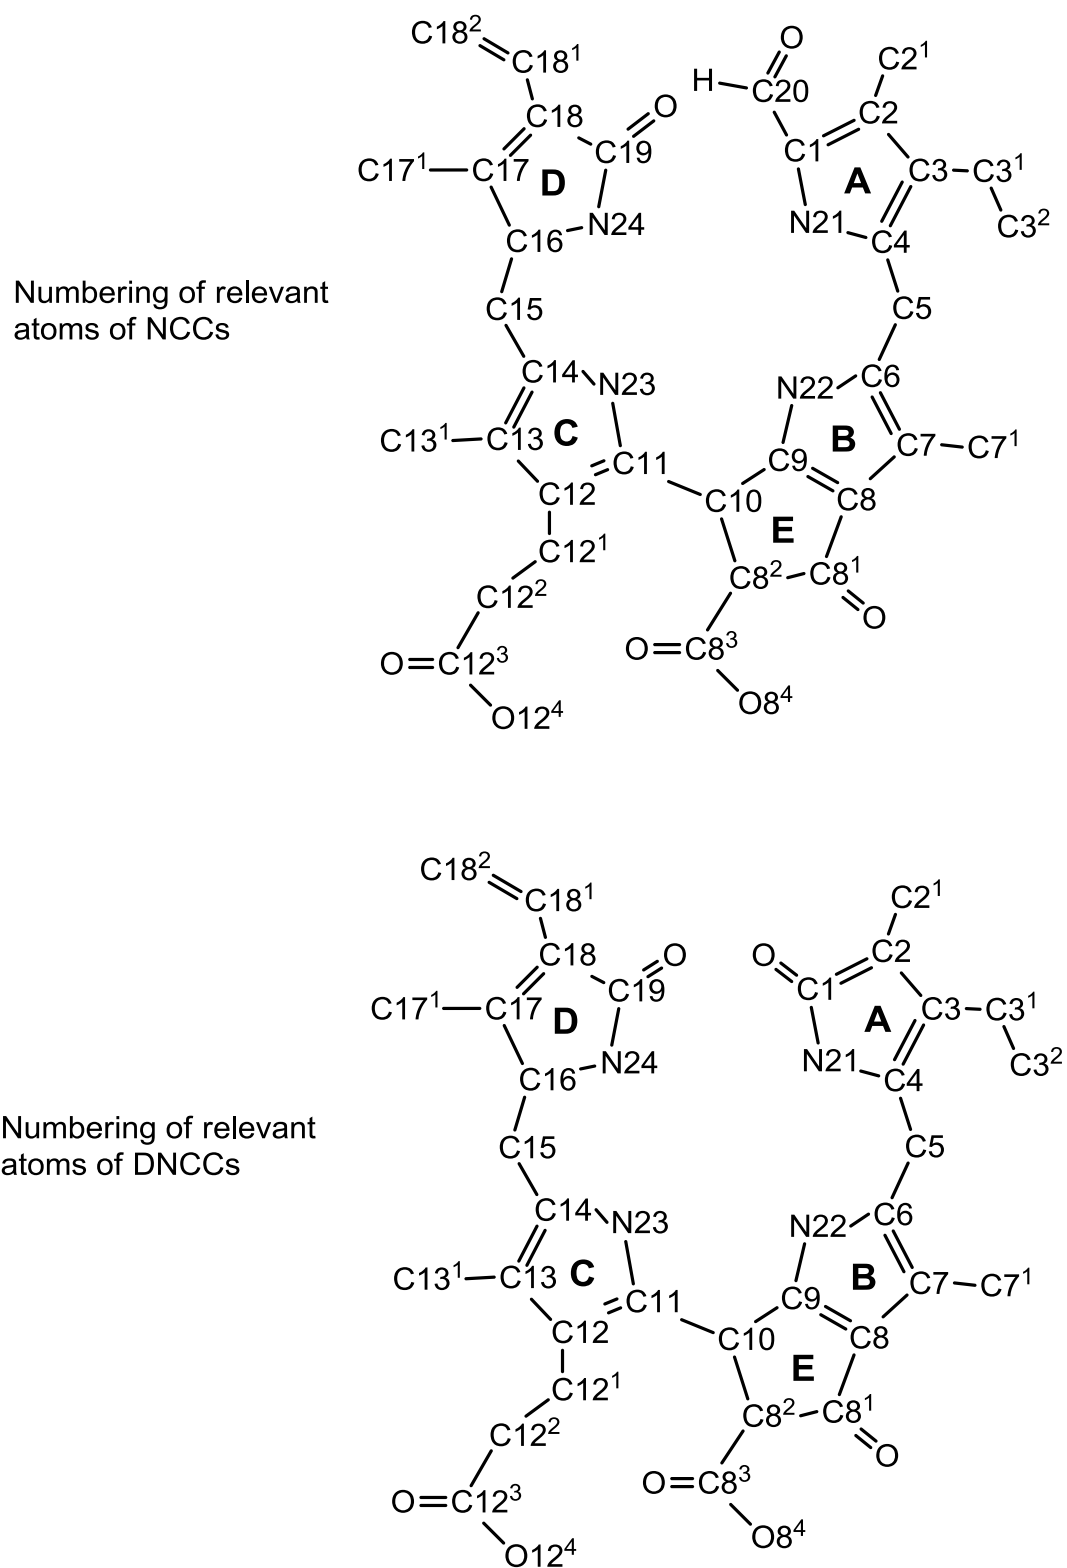

**Figure 1S.** Numbering of relevant atoms of NCCs (top) and of DNCCs (bottom)

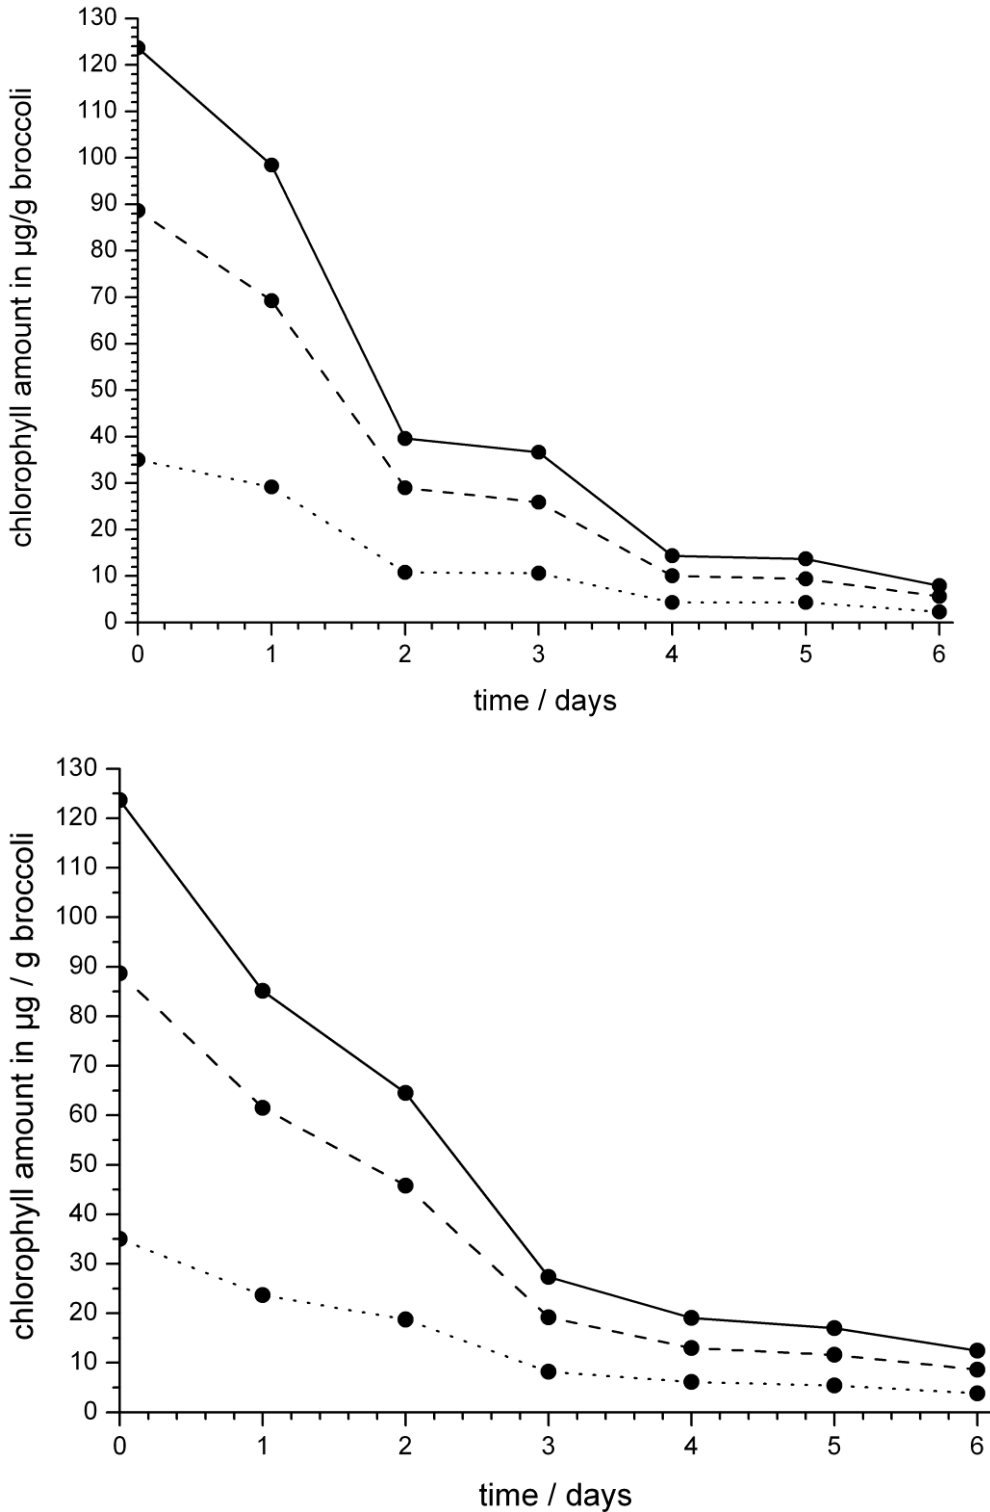

**Figure 2S.** Qualitative analysis of time dependence of the amounts of chlorophyll in the raw broccoli plant material during the de-greening in the dark (top) and in day light (bottom). Total chlorophyll  $a+b$  (continuous line), chlorophyll  $a$  (dashed line) and chlorophyll  $b$  (dotted line) in  $\mu\text{g} / \text{g}$  raw material

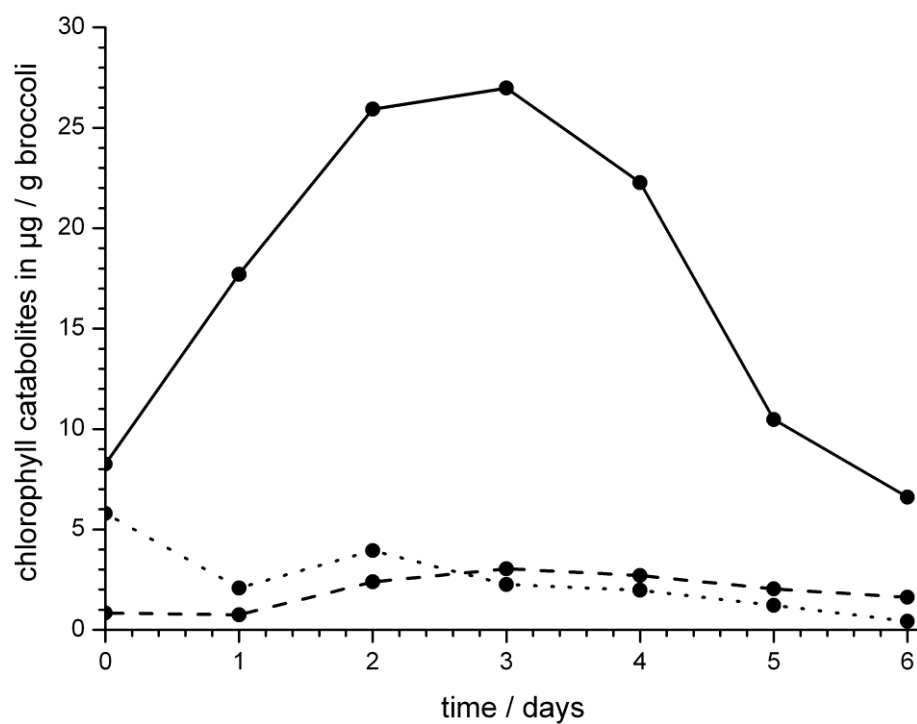

**Figure 3S.** Qualitative analysis of time dependence of the amounts of colourless chlorophyll catabolites in the raw broccoli during the de-greening in the dark. Amount (in microgram per gram broccoli) of *Bo-NCC-1* (continuous line), *Bo-NCC-2* (dotted line) and *Bo-DNCC* (dashed line) in raw material

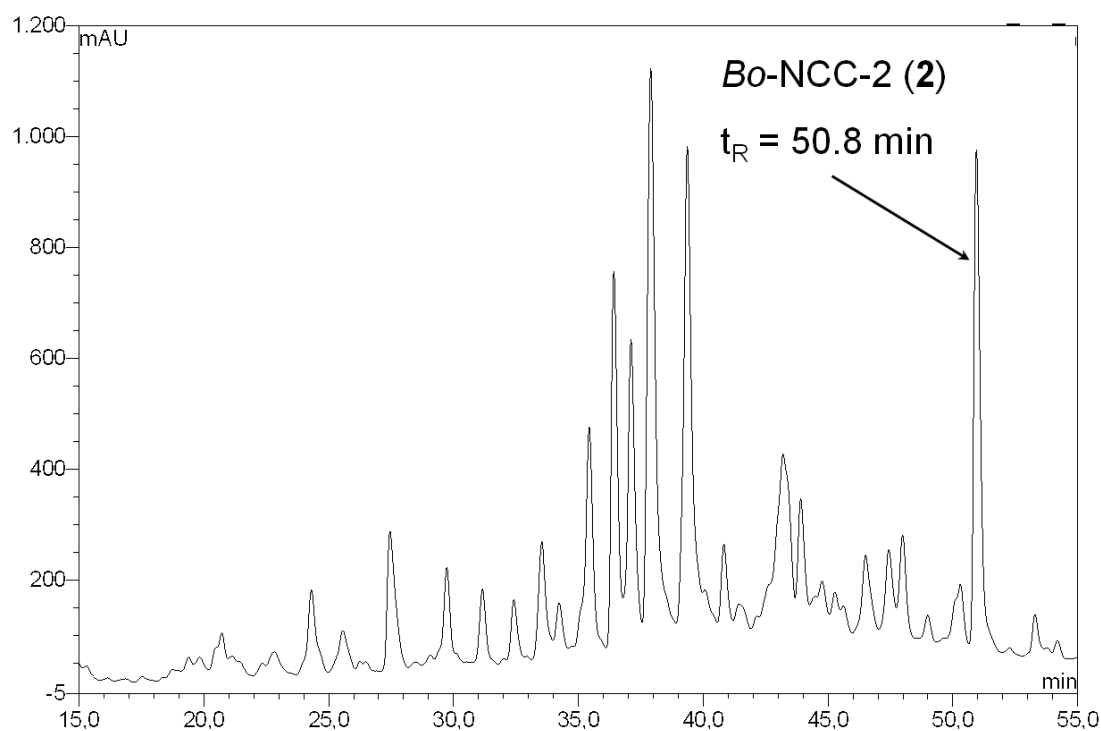

**Figure 4S.** HPLC-Analysis of the  $\text{CH}_2\text{Cl}_2$  phase of the broccoli extract (detected by 320nm).

The fraction identified as *Bo-NCC-2 (2)* is highlighted

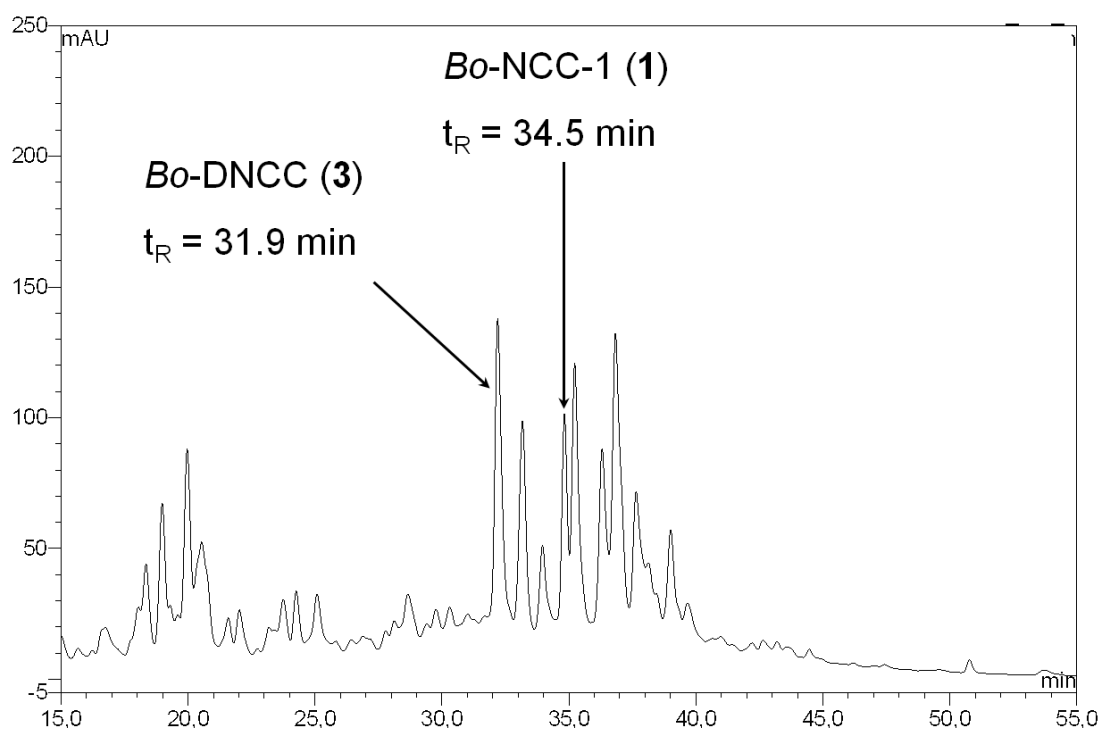

**Figure 5S.** HPLC-Analysis of the aqueous phase of the broccoli extract (detected by 250nm).

The fractions identified as *Bo-NCC-1 (1)* and *Bo-DNCC (3)* are highlighted

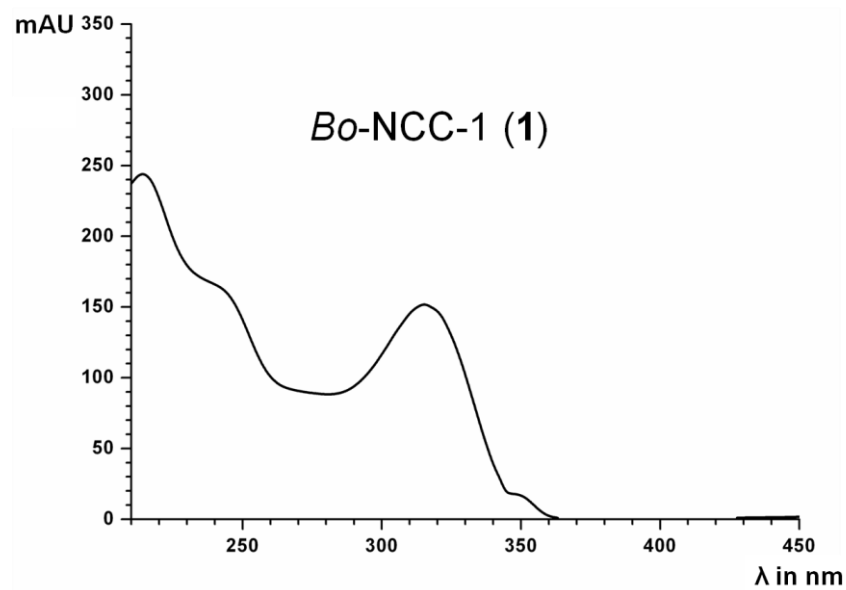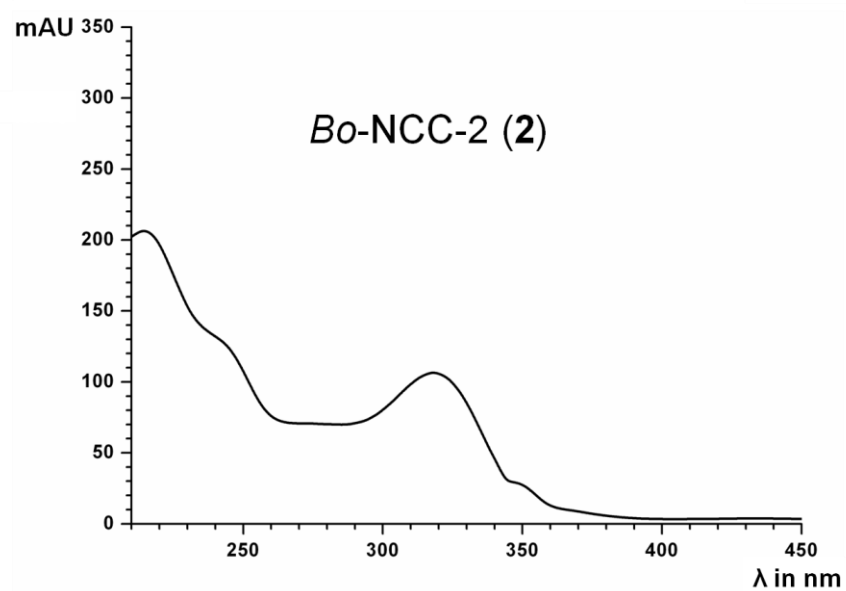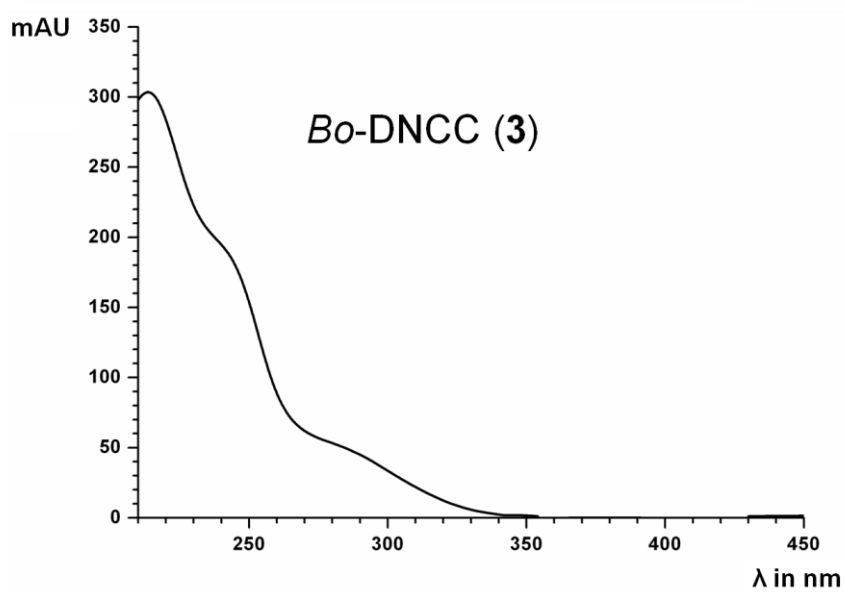

**Figure 6S.** UV/Vis-online spectra of *Bo-NCC-1* (1,  $t_R = 34.5$  min), of *Bo-NCC-2* (2,  $t_R = 50.8$  min) and of *Bo-DNCC* (3,  $t_R = 31.9$  min)

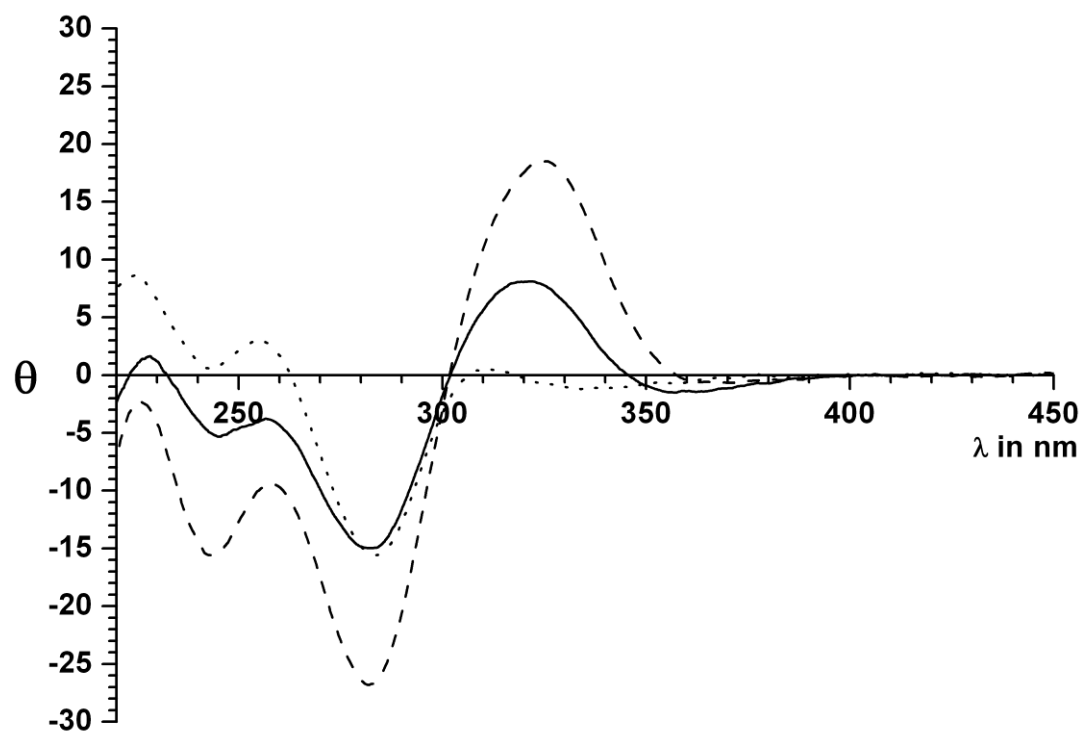

**Figure 7S.** CD –spectra of *Bo*-NCC-1 (1, solid line), of *Bo*-NCC-2 (2, dashed line) and of *Bo*-DNCC (3, dotted line) in unbuffered aqueous solution



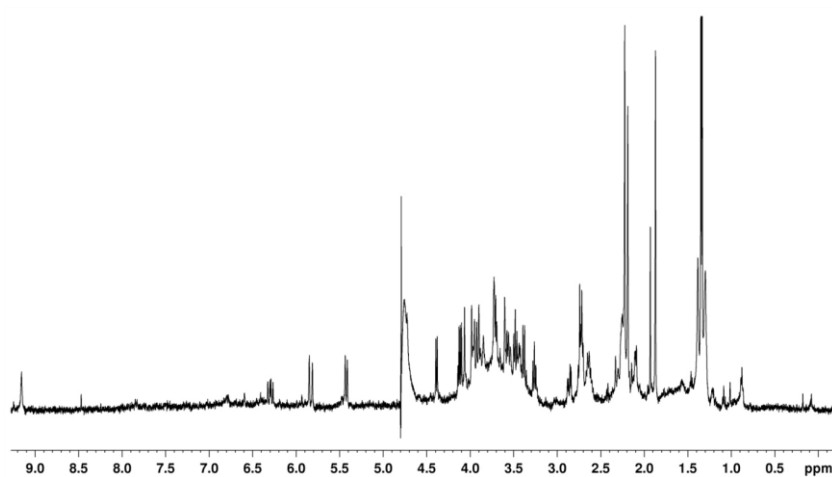

**Figure 8S.** 500 MHz <sup>1</sup>H-NMR-spectrum of *Bo*-NCC-1 (**1**) in D<sub>2</sub>O,

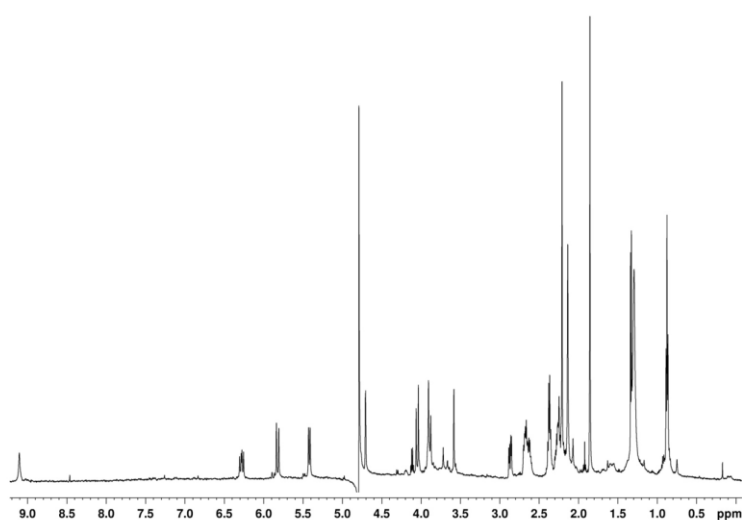

**Figure 9S.** 600 MHz <sup>1</sup>H-NMR-spectrum of *Bo*-NCC-2 (**2**) in D<sub>2</sub>O

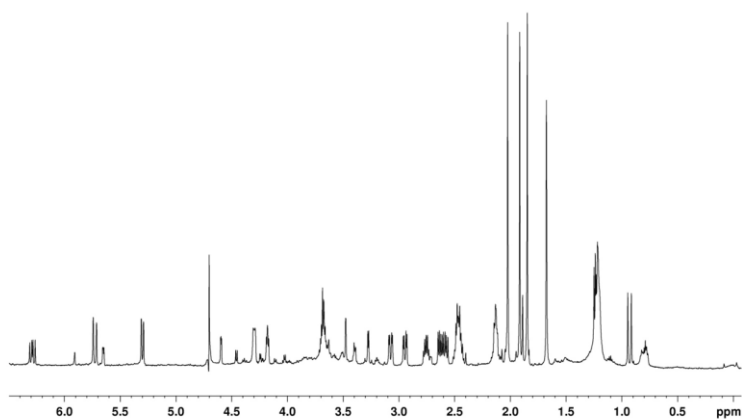

**Figure 10S.** 600 MHz <sup>1</sup>H-NMR-spectrum of *Bo*-DNCC (**3**) in D<sub>2</sub>O

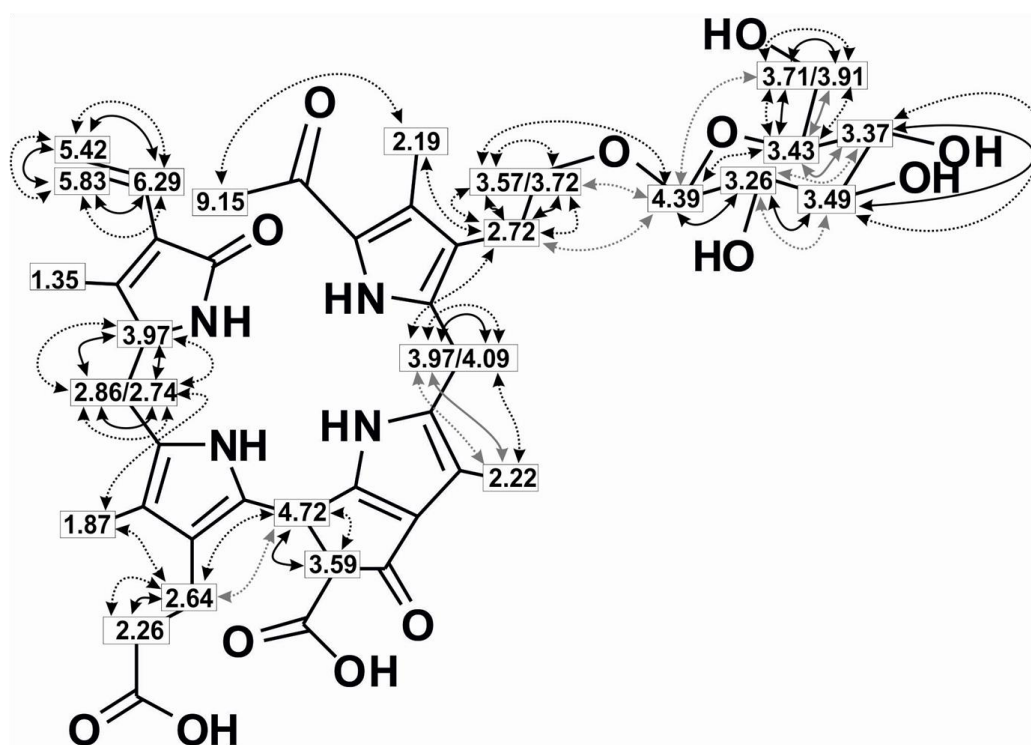

**Figure 11S.** Graphical representation of  $^1\text{H}$ -NMR chemical-shift data of *Bo*-NCC-1 (**1**) in  $\text{D}_2\text{O}$ . Assignments of signals in 500 MHz  $^1\text{H}$ -NMR-spectra of carbon-bound hydrogen atoms (solid arrows represent COSY correlations, dashed arrows represent ROESY correlations)

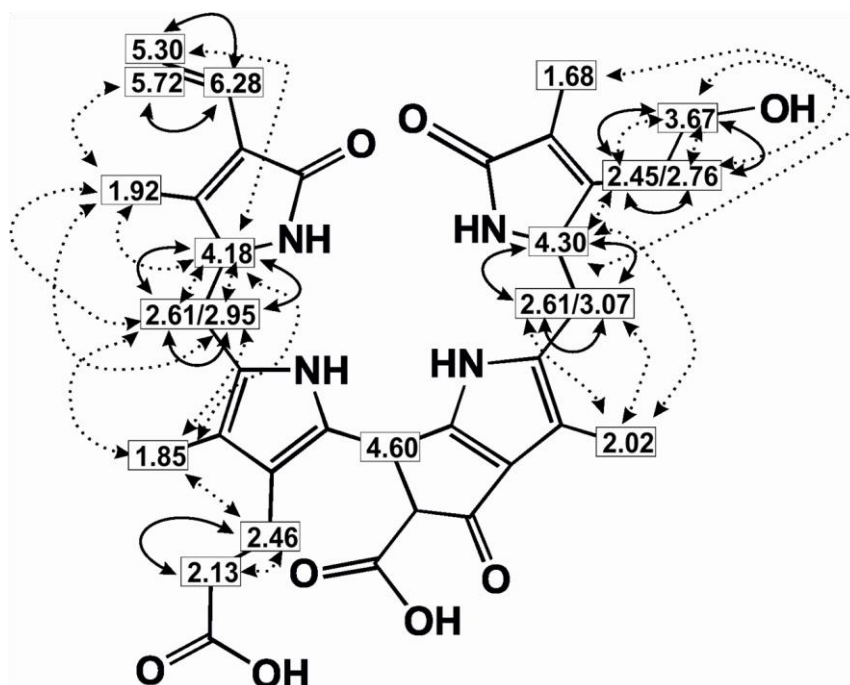

**Figure 12S.** Graphical representation of  $^1\text{H}$ -NMR chemical-shift data of *Bo*-DNCC (**3**) in  $\text{D}_2\text{O}$ . Assignments of signals in 600 MHz  $^1\text{H}$ -NMR-spectra of carbon-bound hydrogen atoms (solid arrows represent COSY correlations, dashed arrows represent ROESY correlations)

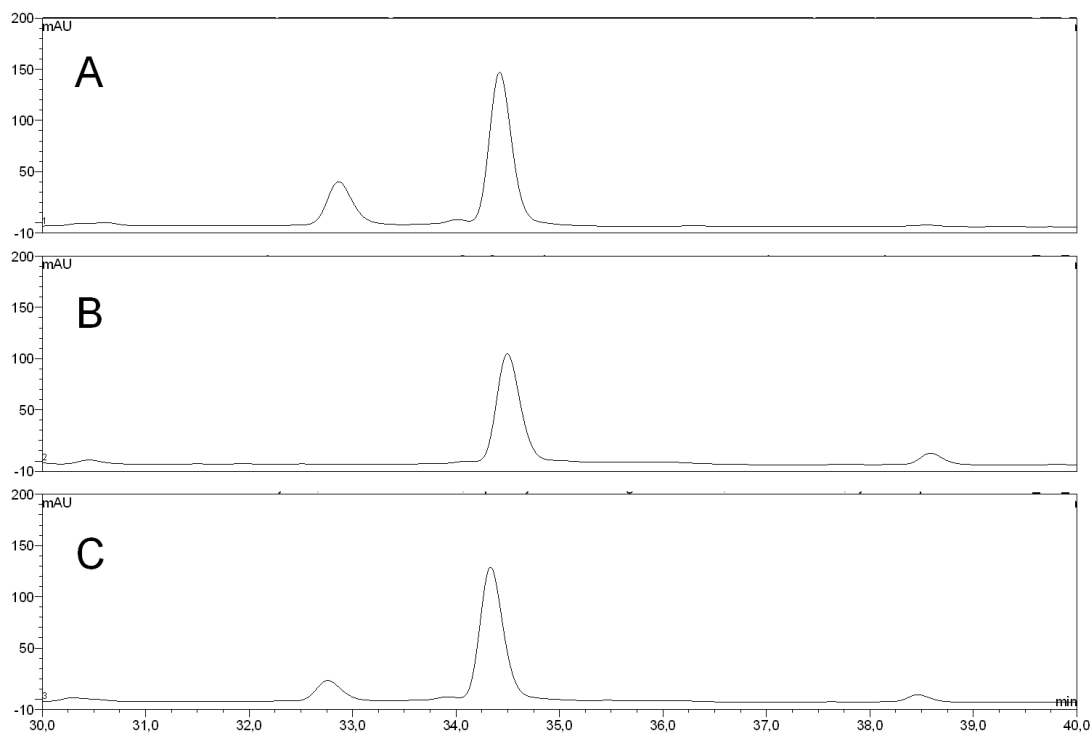

**Figure 13S.** HPL-chromatograms of *Bo*-NCC-1 (**1**) and *Bn*-NCC-2 (detected at 320nm). **A**) *Bo*-NCC-1 (**1**); **B**) *Bn*-NCC-2; **C**) *Bo*-NCC-1 (**1**) and *Bn*-NCC-2 in a (1:1) co-injection.

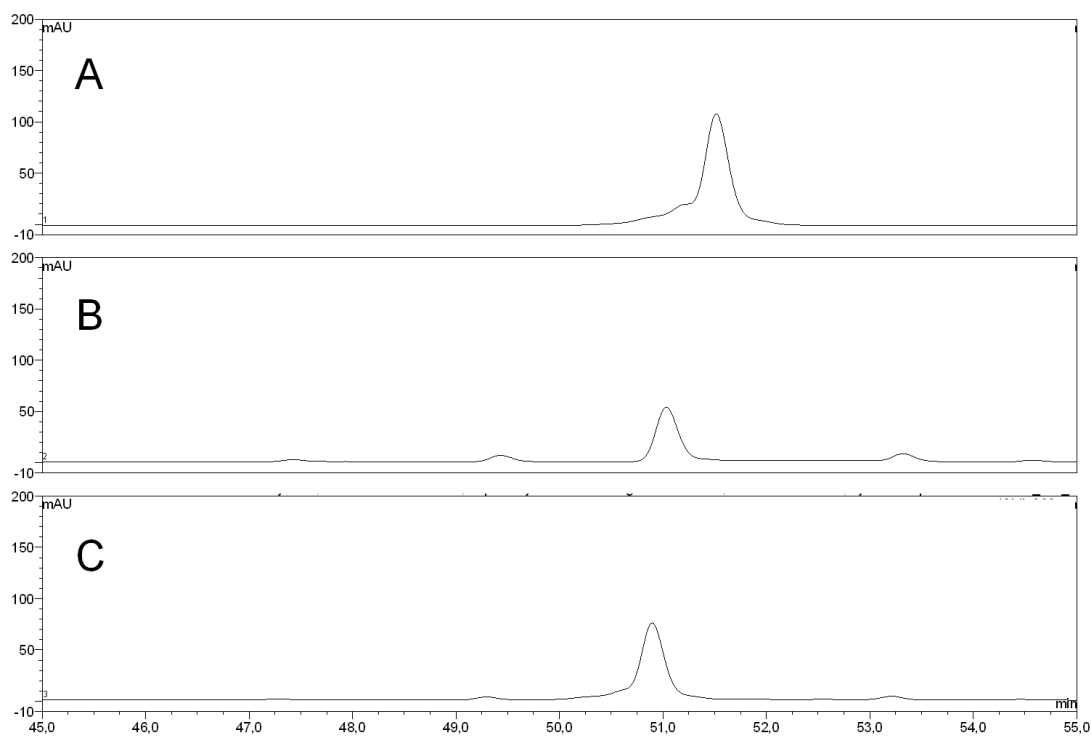

**Figure 14S.** HPL-chromatograms of *Bo*-NCC-2 (**2**) and *Bn*-NCC-4 (detection at 320nm). **A**) *Bo*-NCC-2 (**2**); **B**) *Bn*-NCC-4; **C**) *Bo*-NCC-2 and *Bn*-NCC-4 in a (1:1) co-injection.

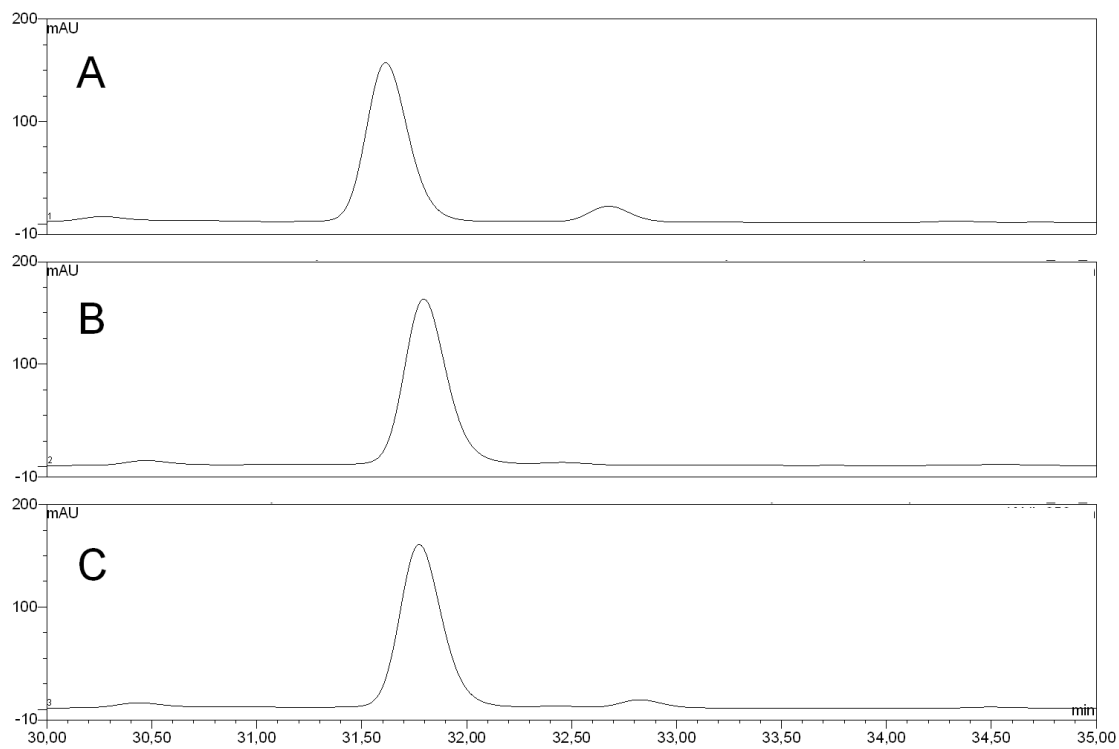

**Figure 15S.** HPL-chromatograms of *Bo*-DNCC (3) and *At*-DNCC-1 (detection at 250nm). **A)** *Bo*-DNCC (3); **B)** *At*-DNCC-1; **C)** *Bo*-DNCC-1 and *At*-DNCC-1 in a (1:1) co-injection.
